# Supplementary material for: Quick removal of metronidazole from aqueous solutions using metal–organic frameworks
Source: Royal Society of Chemistry journal article supplement (doi:10.1039/d1nj06107k), 2022-01-01
Supplement: d1nj06107k1.pdf [file d1nj06107k1.pdf]

## Electronic Supplementary Information (ESI)

### Quick removal of metronidazole from aqueous solutions by metal-organic frameworks

Tina Kalhorizadeh,<sup>a</sup> Behnaz Dahrazma,<sup>a,\*</sup> Reza Zarghami,<sup>b,\*</sup> Soheyl Mirzababaei,<sup>b</sup>  
Alexander M. Kirillov,<sup>c,\*</sup> Reza Abazari<sup>d,\*</sup>

<sup>a</sup>*Department of Civil and Environment Engineering, Shahrood University of Technology, Shahrood, Iran. E-mail: behnaz\_dahrazma@shahroodut.ac.ir*

<sup>b</sup>*Pharmaceutical Engineering Research Lab., Pharmaceutical Process Centers of Excellence, College of Engineering, University of Tehran, P.O. Box 11155-4563, Tehran, Iran. E-mail: rzarghami@ut.ac.ir*

<sup>c</sup>*Centro de Química Estrutural, Institute of Molecular Sciences, Departamento de Engenharia Química, Instituto Superior Técnico, Universidade de Lisboa, Av. Rovisco Pais, 1049-001 Lisbon, Portugal. E-mail: kirillov@tecnico.ulisboa.pt*

<sup>d</sup>*Department of Chemistry, Faculty of Science, University of Maragheh, P.O. Box 55181-83111, Maragheh, Iran. E-mail: reza.abazari@modares.ac.ir*

*Electronic supplementary information (ESI) available: Additional experimental data on metronidazole removal (Figs. S1-S4, Tables S1 and S2).*

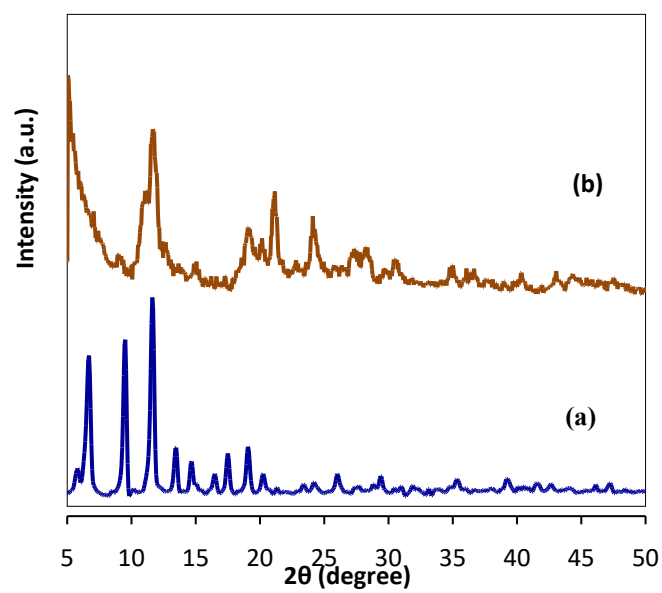

**Fig. S1.** PXRD patterns of HKUST-1 (a) and NH<sub>2</sub>-MIL-101-Fe (b).

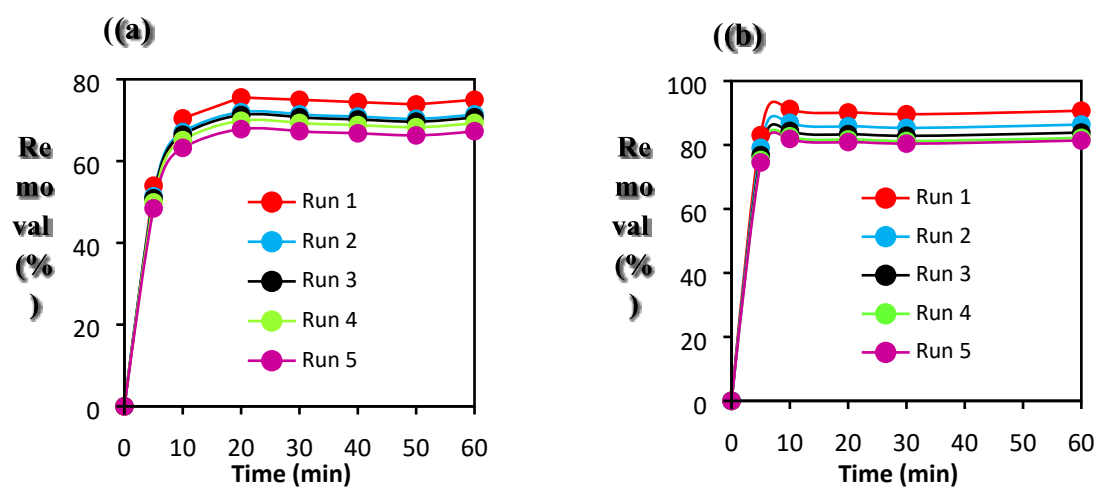

**Fig. S2.** Five recycling runs for the MNZ adsorption over HKUST-1 (a) and NH<sub>2</sub>-MIL-101-Fe (b); (experimental conditions: adsorbent dosage: HKUST-1 = 0.3 g/L, NH<sub>2</sub>-MIL-101-Fe = 0.2 g/L, initial MNZ concentration = 5 ppm, pH = 7, T = 25 °C).

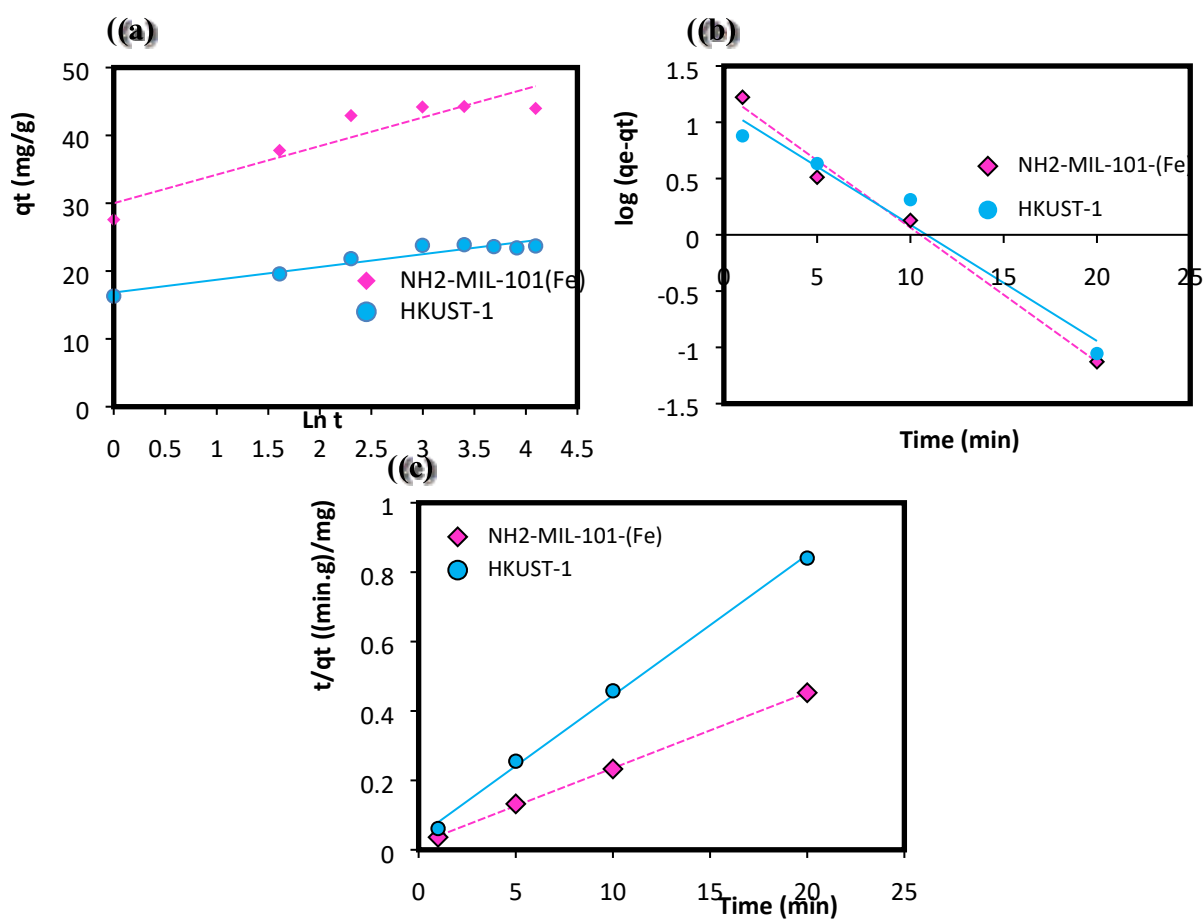

**Fig. S3.** Kinetics of MNZ adsorption on HKUST-1 and NH<sub>2</sub>-MIL-101-Fe: zero-order (a) pseudo-first-order (b), and pseudo-second-order (c) (experimental conditions: adsorbent dosage: HKUST-1 = 0.3 g/L, NH<sub>2</sub>-MIL-101-Fe = 0.2 g/L, initial MNZ concentration = 10 ppm, pH = 7, T = 25 °C).

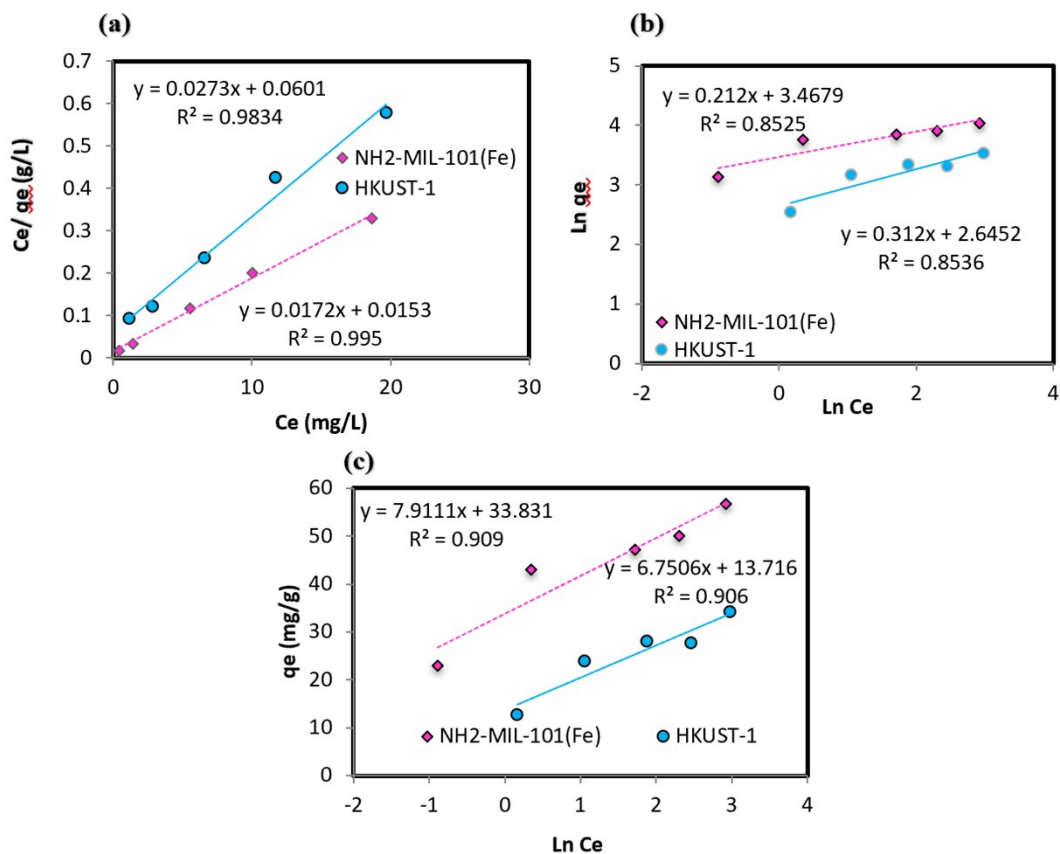

**Fig. S4.** Isotherm models for MNZ adsorption on HKUST-1 and NH<sub>2</sub>-MIL-101-Fe: Langmuir (a), Freundlich (b), and Temkin (c) (experimental conditions: adsorbent HKUST-1 = 0.3 g/L, NH<sub>2</sub>-MIL-101-Fe = 0.2 g/L, initial MNZ concentration = 10 ppm, pH = 7, T = 25 °C).

**Table S1.** Summary data on MNZ adsorption by HKUST-1 and NH<sub>2</sub>-MIL-101-(Fe).

| HKUST-1                     | Adsorbent dosage: 0.3 g/l<br>pH=7<br>Contact time=20 minutes |        | NH <sub>2</sub> -MIL-101-(Fe) | Adsorbent dosage: 0.2 g/l<br>pH=7<br>Contact time=10 minutes |        |
|-----------------------------|--------------------------------------------------------------|--------|-------------------------------|--------------------------------------------------------------|--------|
| Concentration               | 5 ppm                                                        | 10 ppm | Concentration                 | 5 ppm                                                        | 10 ppm |
| Maximum Removal (%)         | 75.6                                                         | 69.9   | Maximum Removal (%)           | 91.3                                                         | 87.2   |
| Maximum Adsorption Capacity | 12.71                                                        | 30.14  | maximum adsorption capacity   | 22.9                                                         | 42.92  |
| Isotherm                    | Langmuir                                                     |        | Isotherm                      | Langmuir                                                     |        |
| Kinetic Model               | pseudo-second-order                                          |        | Kinetic Model                 | pseudo-second-order                                          |        |

**Table S2.** Summary for MNZ removal by different adsorbents.

| Adsorbent                                 | Removal (%) | Adsorption condition |                           |     |           | Ref |
|-------------------------------------------|-------------|----------------------|---------------------------|-----|-----------|-----|
|                                           |             | Time (min)           | Dose (g.L <sup>-1</sup> ) | pH  | Temp (°C) |     |
| UiO-66-NH <sub>2</sub>                    | NR          | 130                  | 0.1                       | 6   | 25        | [1] |
| HKUST-1-based SnO <sub>2</sub>            | NR          | 240                  | 2                         | 3   | NR        | [2] |
| nanoCoFe <sub>2</sub> O <sub>4</sub> @MC  | 85.3        | 120                  | 0.2                       | 11  | NR        | [3] |
| CuCoFe <sub>2</sub> O <sub>4</sub> @MC/AC | 93.78       | 15                   | 0.4                       | 3   | NR        | [4] |
| CuFe <sub>2</sub> O <sub>4</sub> @PBC     | 96.3        | 60                   | 0.4                       | 3   | NR        | [5] |
| combination of pyrite with ZVI            | ~ 100       | 360                  | ZVI=1<br>Pyrite=4         | 5-9 | NR        | [6] |
| Fe-Ce@N-BC                                | 97.5        | 60                   | NR                        | NR  | NR        | [7] |
| PAA/PVDF-NZVI                             | 98          | 120                  | NR                        | 5   | NR        | [8] |
| GO/ $\beta$ -CD/Ag                        | 93.5        | 20                   | 0.4                       | 2   | 15        | [9] |

|                               |      |    |      |     |    |           |
|-------------------------------|------|----|------|-----|----|-----------|
| AMGG                          | 84   | 27 | 0.86 | 5.9 | 26 | [10]      |
| mixture of NiO and ZnO        | 87.7 | 50 | NR   | NR  | NR | [11]      |
| HKUST-1                       | 69.9 | 20 | 0.3  | 7   | 25 | This Work |
| NH <sub>2</sub> -MIL-101-(Fe) | 91.3 | 10 | 0.2  | 7   | 25 |           |

NR = Not Reported

## References

- 1 K. Talha, B. Wang, J. Liu, R. Ullah, F. Feng, J. Yu, S. Chen and J. Li, Effective adsorption of metronidazole antibiotic from water with a stable Zr(IV)-MOFs: Insights from DFT, Kinetics and thermodynamics studies, *J. Environ. Chem. Eng.*, 2020, **8**, 103642.
- 2 R. Sheikhsamany, H. Faghihian and R. Fazaeli, Synthesis of novel HKUST-1-based SnO<sub>2</sub> porous nanocomposite with the photocatalytic capability for degradation of metronidazole, *Mater. Sci. Semicond. Process.*, 2022, **138**, 106310.
- 3 A. Nasiri, F. Tamaddon, M.H. Mosslemin, M. Faraji, A microwave assisted method to synthesize nanoCoFe<sub>2</sub>O<sub>4</sub>@methyl cellulose as a novel metal-organic framework for antibiotic degradation, *MethodsX*, 2019, **6**, 1557-1563.
- 4 S. Rajabi, A. Nasiri and M. Hashemi, Enhanced activation of persulfate by CuCoFe<sub>2</sub>O<sub>4</sub>@MC/AC as a novel nanomagnetic heterogeneous catalyst with ultrasonic for metronidazole degradation, *Chemosphere*, 2022, **286**, 131872.
- 5 H. Cai, Z. Ma and T. Zhao, Fabrication of magnetic CuFe<sub>2</sub>O<sub>4</sub>@PBC composite and efficient removal of metronidazole by the photo-Fenton process in a wide pH range, *J. Environ. Manage.*, 2021, **300**, 113677.



- 6 H. Linting, C. Kun, D. Huaping, L. Jianfa and L. Yimin, Enhanced effect of pyrite on the removal of metronidazole by zero valent iron, *J. Colloid Interface Sci.*, 2021, **600**, 775-783.
- 7 K. Xiao, F. Liang, J. Liang, W. Xu, Z. Liu, B. Chen, X. Jiang, X. Wu, J. Xu, J. Beiyan, and H. Wang, Magnetic bimetallic Fe, Ce-embedded N-enriched porous biochar for peroxymonosulfate activation in metronidazole degradation: Applications, mechanism insight and toxicity evaluation, *Chem. Eng. J.*, 2022, **433**, 134387.
- 8 J. Yang, X. Wang, M. Zhu, H. Liu and J. Ma, Investigation of PAA/PVDF–NZVI hybrids for metronidazole removal: synthesis, characterization, and reactivity characteristics, *J. Hazard. Mater.*, 2014, **264**, 269-277.
- 9 N. Jafarzadeh, H. Rezazadeh, Z. Ramezani, S. Jorfi, M. Ahmadi, H. Ghariby and G. Barzegar, Taguchi optimization approach for metronidazole removal from aqueous solutions by using graphene oxide functionalized  $\beta$ -cyclodextrin/Ag nanocomposite, *Water Sci. Technol.*, 2018, **2017**, 36-47.
- 10 Z. Bonyadi, F. Noghani, A. Dehghan, J.P. Van der Hoek, D.A. Giannakoudakis, S.K. Ghadiri, I. Anastopoulos, M. Sarkhosh, J.C. Colmenares and M. Shams, Biomass-derived porous aminated graphitic nanosheets for removal of the pharmaceutical metronidazole: Optimization of physicochemical features and exploration of process mechanisms, *Colloids Surf, A Physicochem Eng Asp.*, 2021, **611**, 125791.
- 11 H. Derikvandi and A. Nezamzadeh-Ejhieh, Increased photocatalytic activity of NiO and ZnO in photodegradation of a model drug aqueous solution: Effect of coupling, supporting, particles size and calcination temperature, *J. Hazard. Mater.*, 2017, **321**, 629-638.
